# Supplementary material for: Hyaluronate modified upconversion nanoparticles for near infrared light-triggered on–off tattoo systems
Source: Royal Society of Chemistry journal article supplement (doi:10.1039/c6ra28600c), 2017-01-01
Supplement: c6ra28600c1.pdf [file c6ra28600c1.pdf]

## Electronic Supplementary Information

# Hyaluronate Modified Upconversion Nanoparticles for Near Infrared Light-Triggered On-Off Tattoo Systems

Seulgi Han,<sup>a</sup> Song Eun Beack,<sup>a</sup> Sanghwa Jeong,<sup>b</sup> Byung Woo Hwang,<sup>a</sup>

Myeong Hwan Shin,<sup>a</sup> Hyemin Kim,<sup>a</sup> Sungjee Kim,<sup>b</sup> and Sei Kwang Hahn <sup>a,†</sup>

<sup>a</sup> Department of Materials Science and Engineering, <sup>b</sup> Department of Chemistry, Pohang University of Science and Technology (POSTECH), 77 Cheongam-ro, Nam-gu, Pohang, Kyungbuk 790-784, Korea.

## EXPERIMENTAL SECTION

### Materials

Upconversion nanoparticles (UCNPs) of NaYF<sub>4</sub>:Yb/Er (Y: Yb: Er = 69: 28: 3) were synthesized as reported elsewhere<sup>1</sup>. Yttrium (III) chloride hexahydrate (YCl<sub>3</sub>•6H<sub>2</sub>O), ytterbium (III) chloride hexahydrate (YbCl<sub>3</sub>•6H<sub>2</sub>O), erbium chloride hexahydrate (ErCl<sub>3</sub>•6H<sub>2</sub>O), ammonium fluoride (NH<sub>4</sub>F), octadecene-1, cyclohexane, poly(allylamine) (PAAm) solution (20 wt. % in H<sub>2</sub>O) and N-hydroxysuccinimide sodium salt (NHS) were purchased from Sigma Aldrich. Sodium hydroxide (NaOH) was obtained from Samchun Pure Chemicals. Hyaluronate (HA, MW = 150 kg/mol) was obtained from Lifecore. N-(3-dimethylaminopropyl)-N-ethylcarbodiimide hydrochloride (EDC) was obtained from Tokyo

Chemical Industry.

### **Preparation of UCNP, UCNP-PAAm and HA-UCNP**

NaYF<sub>4</sub>:Yb/Er nanoparticles were synthesized using the aqueous solution of LnCl<sub>3</sub> [0.78 ml of YCl<sub>3</sub>•6H<sub>2</sub>O (1 M), 0.2 ml of YbCl<sub>3</sub>•6H<sub>2</sub>O (1 M), 0.2 ml of ErCl<sub>3</sub>•6H<sub>2</sub>O (0.1 M)] in a three-necked 250 mL flask. The flask was kept in a spherical heating mantle and heated up at 110 °C to evaporate the water from LnCl<sub>3</sub>•xH<sub>2</sub>O with magnetic stirring. Then, 6 ml of oleic acid and 15 ml of 1-octadecene were added and heated up at 150 °C for 30 min to make a homogeneous solution. After cooling down to 60°C, 5 ml of methanol solution containing NH<sub>4</sub>F (0.148 g) and NaOH (0.1 g) was added drop by drop. The solution was heated up at 110 °C for 20 min to evaporate the methanol and residual H<sub>2</sub>O. The neck of flask was sealed with a rubber stopper and connected to the nitrogen-filled balloon with a syringe for stabilization at high pressure. Another neck of flask was connected to a dual manifold schlenk to keep the solution under vacuum for 10 min and nitrogen atmosphere by switching the stopcock. The solution was heated to 300 °C under nitrogen for 1 h at a heating rate of 10 °C/min and cooled down to room temperature. The mixture was rinsed with 40 ml acetone and transferred to a 50 ml conical tube. The solution filled tube was centrifuged at 6,654g for 10 min at 20 °C. After removal of the supernatant, the pellet was dissolved in 20 ml of cyclohexane. After centrifugation again at 1,000g and 20 °C for 5 min, the supernatant containing UCNP was collected in a glass vial.

The produced hydrophobic UCNP was surface-modified by ligand exchange using PAAm according to a previously published procedure<sup>2</sup>. The PAAm solution (10 µl, 20 wt% in H<sub>2</sub>O) was dispersed in 4 ml ethanol by sonication for 20 min. The hydrophobic UCNP (~ 4 mg) solution in 2 ml cyclohexane was added into the PAAm solution dropwise and stirred vigorously at room temperature for 36 h. The obtained nanoparticles were re-dispersed in water after centrifugation at 10,400g and room temperature for 20 min. The covalent

conjugation between amine groups of UCNP-PAAm and carboxyl groups of HA was carried out by the EDC chemistry. One ml of aqueous solution containing 0.5 mg HA and *ca.* 0.5 mg UCNP-PAAm stirred homogenously for 30 min. Then, 20 molar excess of EDC and sulfo-NHS sodium salt to a single chain of HA were added into the mixture and stirred vigorously at room temperature for 24 h. The HA-UCNP conjugate solution was dialyzed in deionized (DI) water for 1 day to remove unreacted reagents and catalysts, and then freeze-dried for a day.

### **Characterization of UCNP, UCNP-PAAm and HA-UCNP**

The core structure and compositions of UCNP were analyzed by transmission electron microscopy (TEM, JEM-1011, JEOL Co.) and inductively coupled plasma atomic emission spectroscopy (ICP-AES). The uniform hexagonal crystal lattice of UCNP was observed by high resolution transmission electron microscopy (HRTEM, 2200FS with Cs-corrected TEM). The size distribution and zeta potential of nanoparticles were analyzed by dynamic light scattering (DLS, Zetasizer Nano ZS90, Malvern Instruments Co.). The emission spectra were collected with a fluorolog modular spectrofluorometer (Horiba Scientific Co.) using the excitation light source of infrared diode laser at 980 nm (SDL-980-LM-2000T, Shanghai Dream Lasers Technology Co.).

### **HiLyte labelling of HA for the analysis of HA concentration**

Five mg of HA was dissolved in 1 ml of DI water with magnetic stirring. The solution was mixed with 20 molar excess of EDC and sulfo-NHS and 3 molar excess of HiLyte™ to a single chain of HA. The mixed solution stirred vigorously at room temperature for 24 h, and dialyzed in DI water and NaOH solution overnight. Then, the resulting HA-HiLyte was obtained by freeze drying. The fluorescence of HiLyte was measured with a microplate

fluorometer (Thermo Scientific Ltd, Fluoroskan Ascent™) at the excitation/emission wavelength of 584/650 nm. After that, HA-HiLyte was conjugated to UCNP-PAAm by the EDC chemistry. The fluorescence of supernatant containing unreacted HA-HiLyte was measured with the microplate fluorometer to determine the concentration of conjugated HA to UCNP-PAAm.

### **Biocompatibility of UCNP-PAAm and HA-UCNP conjugate**

The biocompatibility of UCNP-PAAm and HA-UCNP conjugate was assessed by MTT assay for the viability of NIH3T3 cell, a mouse embryo fibroblast cell line. The cryopreserved cells were seeding in a 75T flask for a day and transferred into 96 well at  $5 \times 10^4$  number. The cells were incubated with the control (medium), UCNP-PAAm and HA-UCNP for a day ( $n = 4$ ). Then, each well was mixed with 50  $\mu$ l of MTT solution (5 mg/ml) for 1 h and then 100  $\mu$ l of dimethyl sulfoxide (Sigma aldrich). Optical density of samples was measured with a microplate spectrometer (Life Science Equipment, EMax Endpoint ELISA microplate reader) with the excitation at 540 nm.

### ***In vivo* transdermal delivery of UCNP-PAAm and HA-UCNP conjugate**

*In vivo* transdermal delivery was performed with 50  $\mu$ l of control (PBS), 0.5 mg/ml UCNP-PAAm and HA-UCNP conjugate for 40 min on 1 cm  $\times$  1 cm dorsal skin of 6-week-old balb/c mice. After sacrifice, the penetration depth of samples into skin was analyzed by two-photon microscopy with 1050 nm light excitation.

**Table S1.** ICP-AES results of UCNP.

| Compositions | Y   | Yb  | Er |
|--------------|-----|-----|----|
| Mass         | 690 | 360 | 35 |
| Molar ratio  | 69  | 28  | 3  |

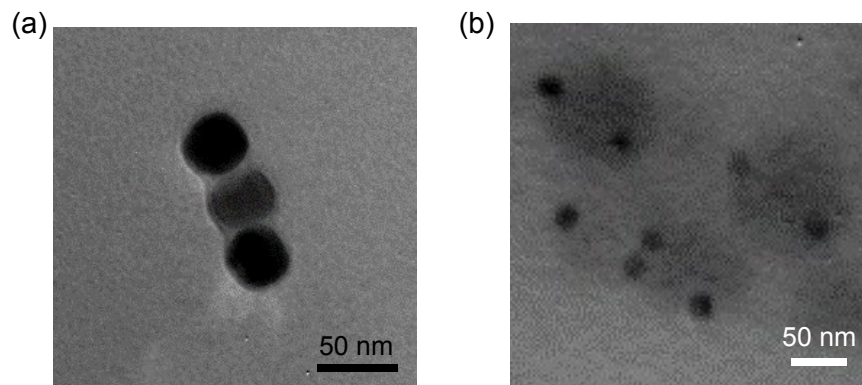

**Fig. S1.** TEM images of (a) UCNP-PAAM and (b) HA-UCNP conjugate.

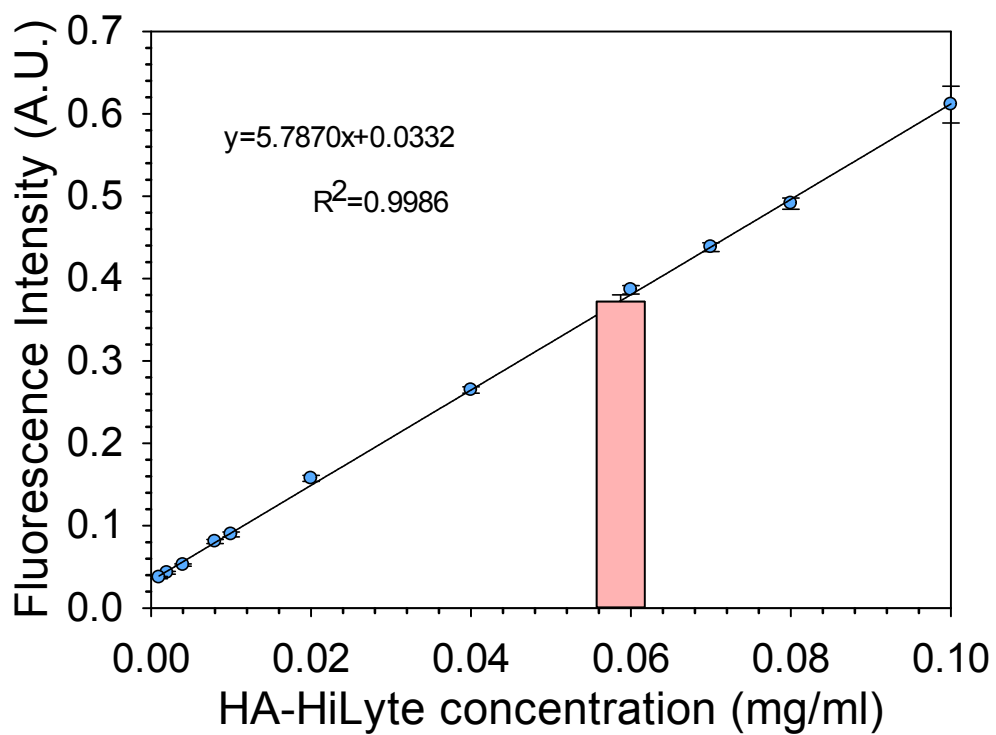

**Fig. S2.** The standard curve of HA-HiLyte™ to estimate the amount of conjugated HA to UCNP-PAAM.

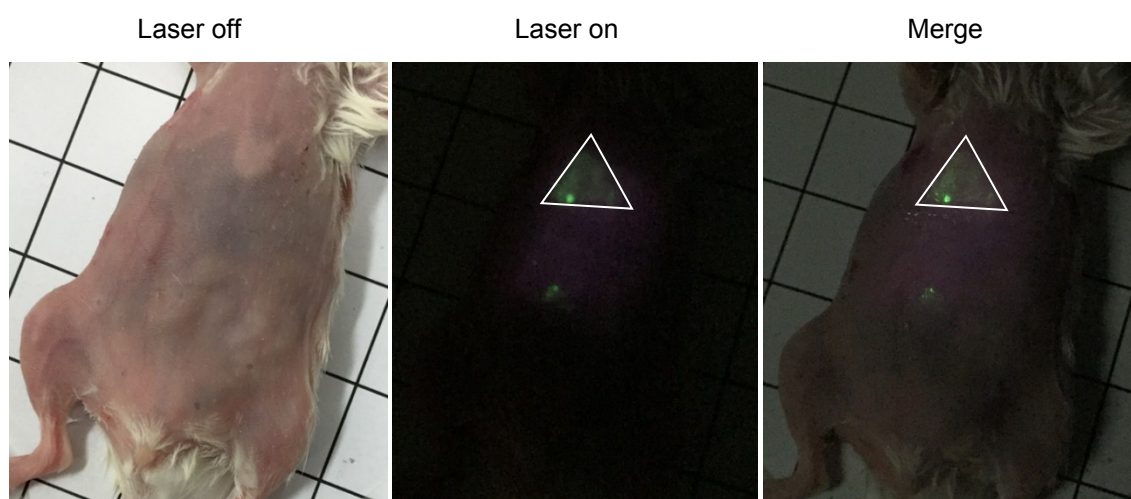

**Fig. S3.** *In vivo* on-off tattoo system in a triangle shape by 980 nm laser irradiation after transdermal delivery of HA-UCNP conjugate.

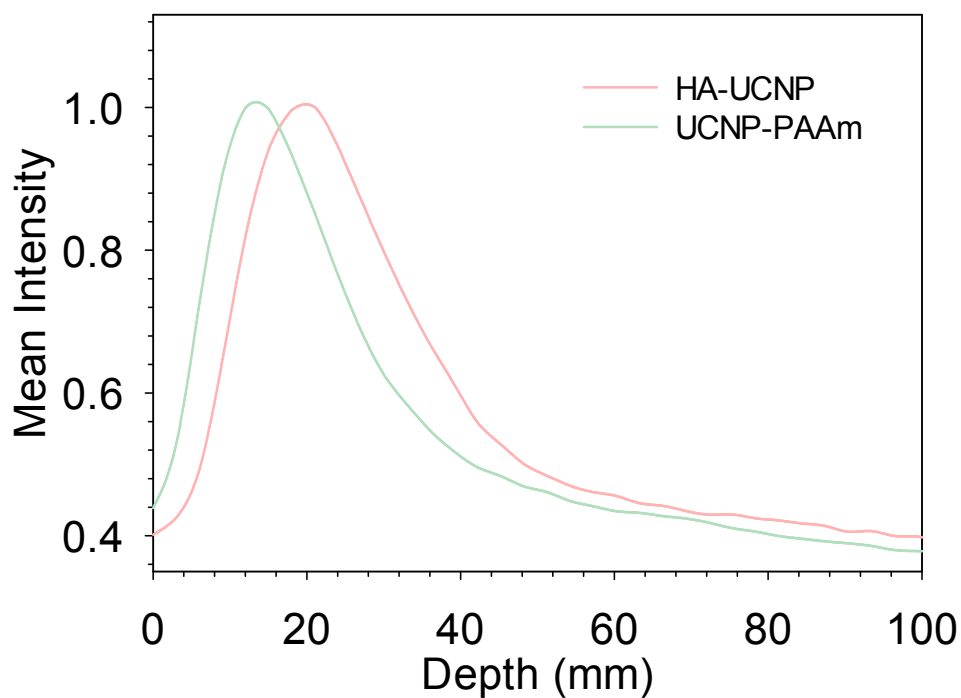

**Fig. S4.** The quantitative comparison for the transdermal delivery of UCNP-PAAm (green) and HA-UCNP conjugate (pink) with increasing penetration depth by two-photon microscopy.

## References

- 1 M. K. Gnanasammandhan, N. M. Idris, A. Kansal, K. Huang and Y. Zhang, *Nat. Protocol.*, 2016, **11**, 688-713.
- 2 L. Xia, X. Kong, X. Liu, L. Tu, Y. Zhang, Y. Chang, K. Liu, D. Shen, H. Zhao and H. Zhang, *Biomaterials*, 2014, **35**, 4146-4156.
